# Supplementary material for: Therapeutic hydrophobic deep eutectic solvents of menthol and fatty acid for enhancing anti-inflammation effects of curcuminoids and curcumin on RAW264.7 murine macrophage cells
Source: Royal Society of Chemistry journal article supplement (doi:10.1039/d2ra01782b), 2022-01-01
Supplement: d2ra01782b1.pdf [file d2ra01782b1.pdf]

## Electronic Supplementary Information (ESI)

### Therapeutic hydrophobic deep eutectic solvents of menthol and fatty acid for enhancing anti-inflammation effects of curcuminoids and curcumin on RAW264.7 murine macrophage cells

Kantapich Kongpol<sup>a, b</sup>, Preenapan Chaihao<sup>a</sup>, Parichat Shuapan<sup>a</sup>, Ploypailin Kongduk<sup>a</sup>, Warangkana Chunglok<sup>a</sup>, and Gorawit Yusakul<sup>c, d\*</sup>

<sup>a</sup>*School of Allied Health Sciences, Walailak University, Nakhon Si Thammarat, Thailand*

<sup>b</sup>*Research Excellence Center for Innovation and Health Product, Walailak University, Nakhon Si Thammarat, Thailand*

<sup>c</sup>*School of Pharmacy, Walailak University, Nakhon Si Thammarat, Thailand*

<sup>d</sup>*Biomass and Oil Palm Center of Excellence, Walailak University, Nakhon Si Thammarat, Thailand*

\*Corresponding author

Email address: gorawit.yu@mail.wu.ac.th

| Contents | Page |
|----------|------|
| Fig. S1  | S2   |
| Fig. S2  | S3   |

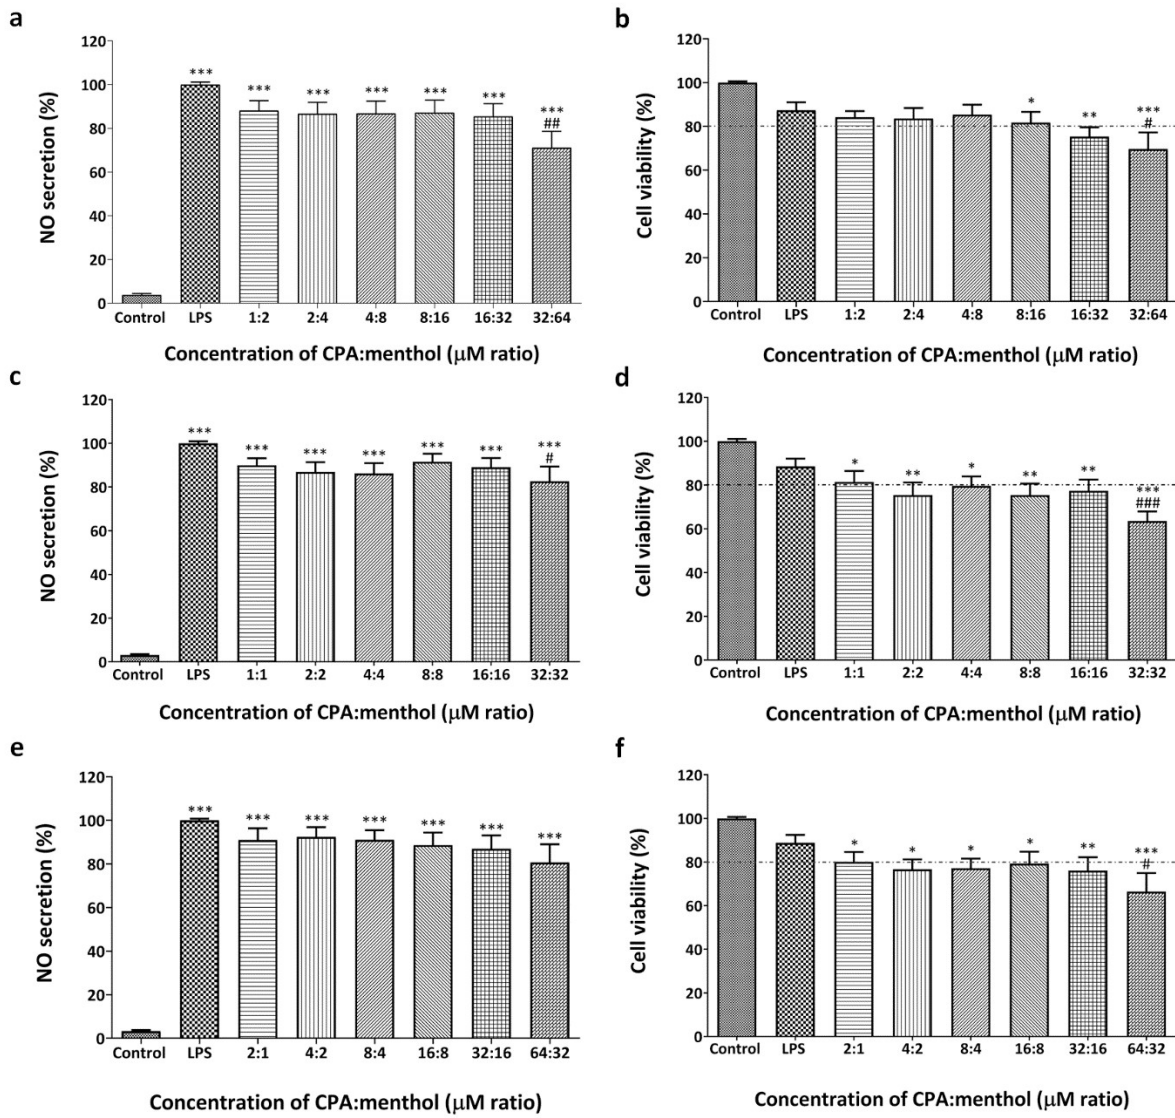

**Fig. S1** Anti-inflammatory (a, c, and e) and cytotoxicity effect (b, d, and f) of CPA:menthol at 1:2, 1:1, and 2:1  $\mu\text{M}$  ratio, respectively, on RAW264.7 cells. Each bar graph represents the mean  $\pm$  S.E.M. The \*, \*\*, and \*\*\* symbols indicate significant differences at  $p < 0.05$ , 0.01, and 0.001 as compared to the untreated cells (control), whereas #, ##, and ### indicate the significant differences at  $p < 0.05$ , 0.01, and 0.001 as compared to the LPS-treated cells (LPS). The statistical analyses were conducted using one-way ANOVA with Dunnett's multiple comparison test.

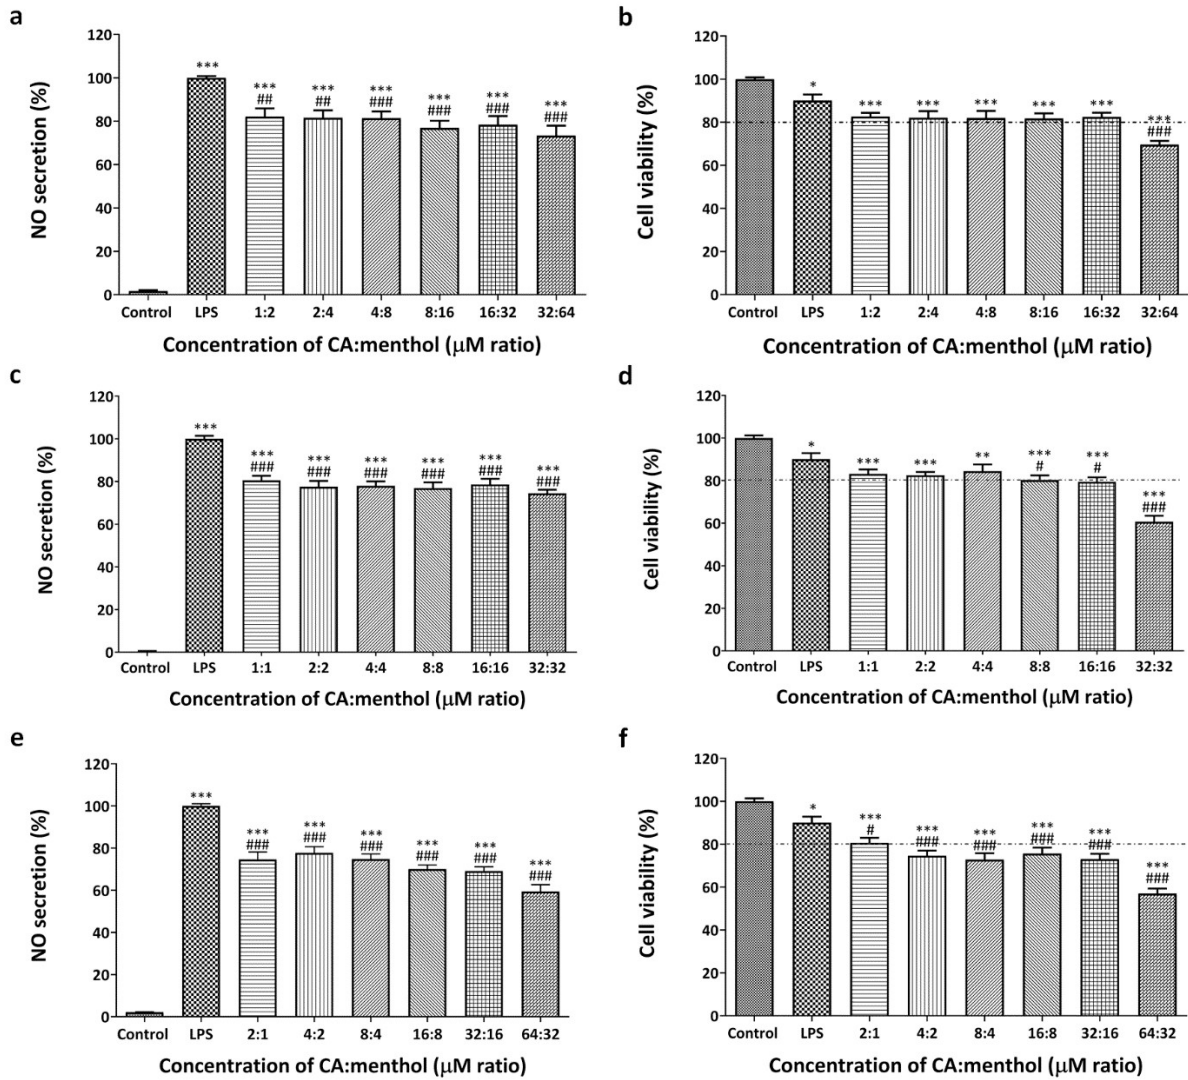

**Fig. S2** Anti-inflammatory (a, c, and e) and cytotoxicity effect (b, d, and f) of CA:menthol at 1:2, 1:1, and 2:1  $\mu\text{M}$  ratio, respectively, on RAW264.7 cells. Each bar graph represents the means  $\pm$  S.E.M. The \*, \*\*, and \*\*\* symbols indicate significant differences at  $p < 0.05$ , 0.01, and 0.001 as compared to the untreated cells (control), whereas #, ##, ### indicate the significant differences at  $p < 0.05$ , 0.01, and 0.001 as compared to the LPS-treated cells (LPS). The statistical analyses were conducted using one-way ANOVA with Dunnett's multiple comparison test.
